# Supplementary material
Source: PubMed Central journal article supplement (PMC2744891)
Supplement: NIHMS91054-supplement-5_si_005.pdf [file NIHMS91054-supplement-5_si_005.pdf]

## Supporting Information

### **Rational Tuning of the Thiolate Donor in Model Complexes of Superoxide Reductase: Direct Evidence for a Trans Influence in Fe<sup>III</sup>-OOR Complexes**

Frances Namuswe,<sup>†</sup> Gary D. Kasper,<sup>†</sup> Amy A. Narducci Sarjeant,<sup>†</sup> Takahiro Hayashi,<sup>‡</sup> Courtney M. Krest,<sup>§</sup> Michael T. Green,<sup>§</sup> Pierre Moënne-Loccoz,<sup>\*,‡</sup> and David P. Goldberg<sup>\*,†</sup>

<sup>†</sup>*Department of Chemistry, Johns Hopkins University, Baltimore, Maryland 21218,*

<sup>‡</sup>*Department of Environmental and Biomolecular Systems, OGI School of Science and Engineering, Oregon Health & Science University, Beaverton, Oregon 97006,*

<sup>§</sup>*Department of Chemistry, Pennsylvania State University, University Park, Pennsylvania 16802*

Email: [plocco@ebs.ogi.edu](mailto:plocco@ebs.ogi.edu); [dpg@jhu.edu](mailto:dpg@jhu.edu)

CIF files for **2**, **3**, **4** and **5**

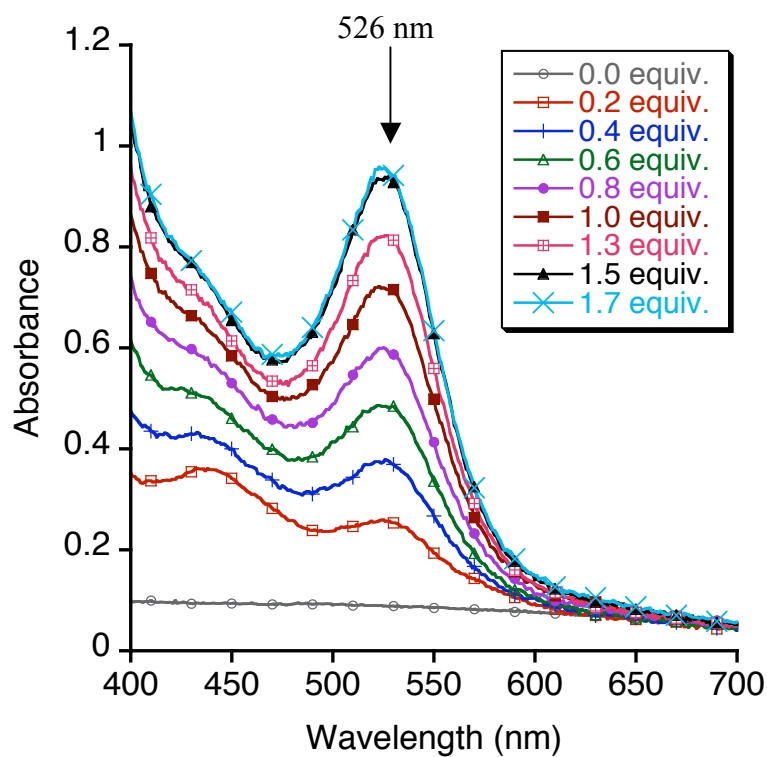

**Figure S1:** UV-vis spectra of the reaction of  $[\text{Fe}^{\text{II}}([\text{15}] \text{aneN}_4)(\text{SPh})](\text{BF}_4)$  with  ${}^t\text{BuOOH}$  (stock solution in *n*-decane) (0 – 1.7 equiv) in  $\text{CH}_2\text{Cl}_2$  at  $-78\text{ }^\circ\text{C}$ . The reaction was allowed to stir after each addition of  ${}^t\text{BuOOH}$  until no further change in the absorption at 526 nm was observed.

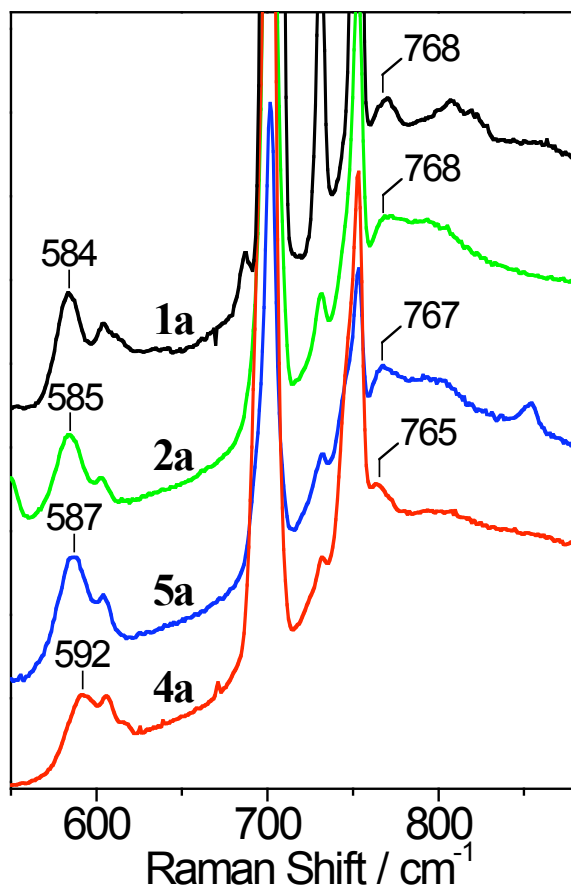

**Figure S2.** RR spectra of  $[\text{Fe}^{\text{III}}([\text{15}]\text{aneN}_4)(\text{SAr})(^{18}\text{O}^{18}\text{O}^t\text{Bu})]^+$  complexes **1a** (black), **2a** (green), **5a** (blue), and **4a** (red) (same experimental conditions as in Figure 6).

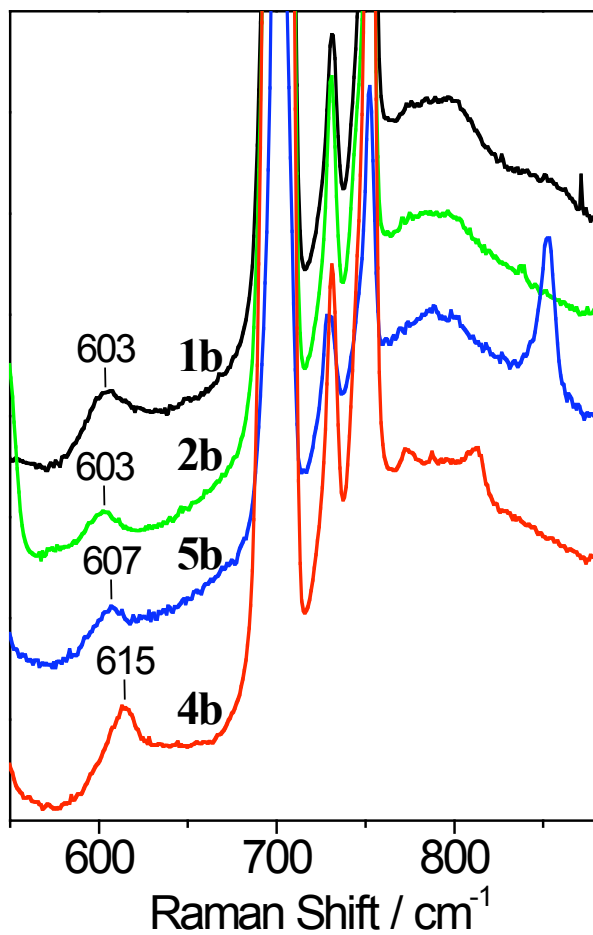

**Figure S3.** RR spectra of  $[\text{Fe}^{\text{III}}([\text{15}]\text{aneN}_4)(\text{SAr})(^{18}\text{O}^{18}\text{OCm})]^+$  complexes **1b** (black), **2b** (green), **5b** (blue), and **4b** (red) (same experimental conditions as in Figure 7).

**Complete ref 56:** [http://www.gaussian.com/citation\\_g03.htm](http://www.gaussian.com/citation_g03.htm)

Gaussian 03, Revision C.02, Frisch, M. J.; Trucks, G. W.; Schlegel, H. B.; Scuseria, G. E.; Robb, M. A.; Cheeseman, J. R.; Montgomery, Jr., J. A.; Vreven, T.; Kudin, K. N.; Burant, J. C.; Millam, J. M.; Iyengar, S. S.; Tomasi, J.; Barone, V.; Mennucci, B.; Cossi, M.; Scalmani, G.; Rega, N.; Petersson, G. A.; Nakatsuji, H.; Hada, M.; Ehara, M.; Toyota, K.; Fukuda, R.; Hasegawa, J.; Ishida, M.; Nakajima, T.; Honda, Y.; Kitao, O.; Nakai, H.; Klene, M.; Li, X.; Knox, J. E.; Hratchian, H. P.; Cross, J. B.; Bakken, V.; Adamo, C.; Jaramillo, J.; Gomperts, R.; Stratmann, R. E.; Yazyev, O.; Austin, A. J.; Cammi, R.; Pomelli, C.; Ochterski, J. W.; Ayala, P. Y.; Morokuma, K.; Voth, G. A.; Salvador, P.; Dannenberg, J. J.; Zakrzewski, V. G.; Dapprich, S.; Daniels, A. D.; Strain, M. C.; Farkas, O.; Malick, D. K.; Rabuck, A. D.; Raghavachari, K.; Foresman, J. B.; Ortiz, J. V.; Cui, Q.; Baboul, A. G.; Clifford, S.; Cioslowski, J.; Stefanov, B. B.; Liu, G.; Liashenko, A.; Piskorz, P.; Komaromi, I.; Martin, R. L.; Fox, D. J.; Keith, T.; Al-Laham, M. A.; Peng, C. Y.; Nanayakkara, A.; Challacombe, M.; Gill, P. M. W.; Johnson, B.; Chen, W.; Wong, M. W.; Gonzalez, C.; and Pople, J. A.; Gaussian, Inc., Wallingford CT, 2004.
